# Supplementary material for: Assessment and management of cirrhosis in people older than 16 years: summary of NICE guidance
Source: HighWire-hosted journal article supplement (doi:10.1136/bmj.i2850), 2016-07-06
Supplement: harp130516.w1_default.pdf [file harp130516.w1_default.pdf]

# Detecting cirrhosis

Tests and monitoring

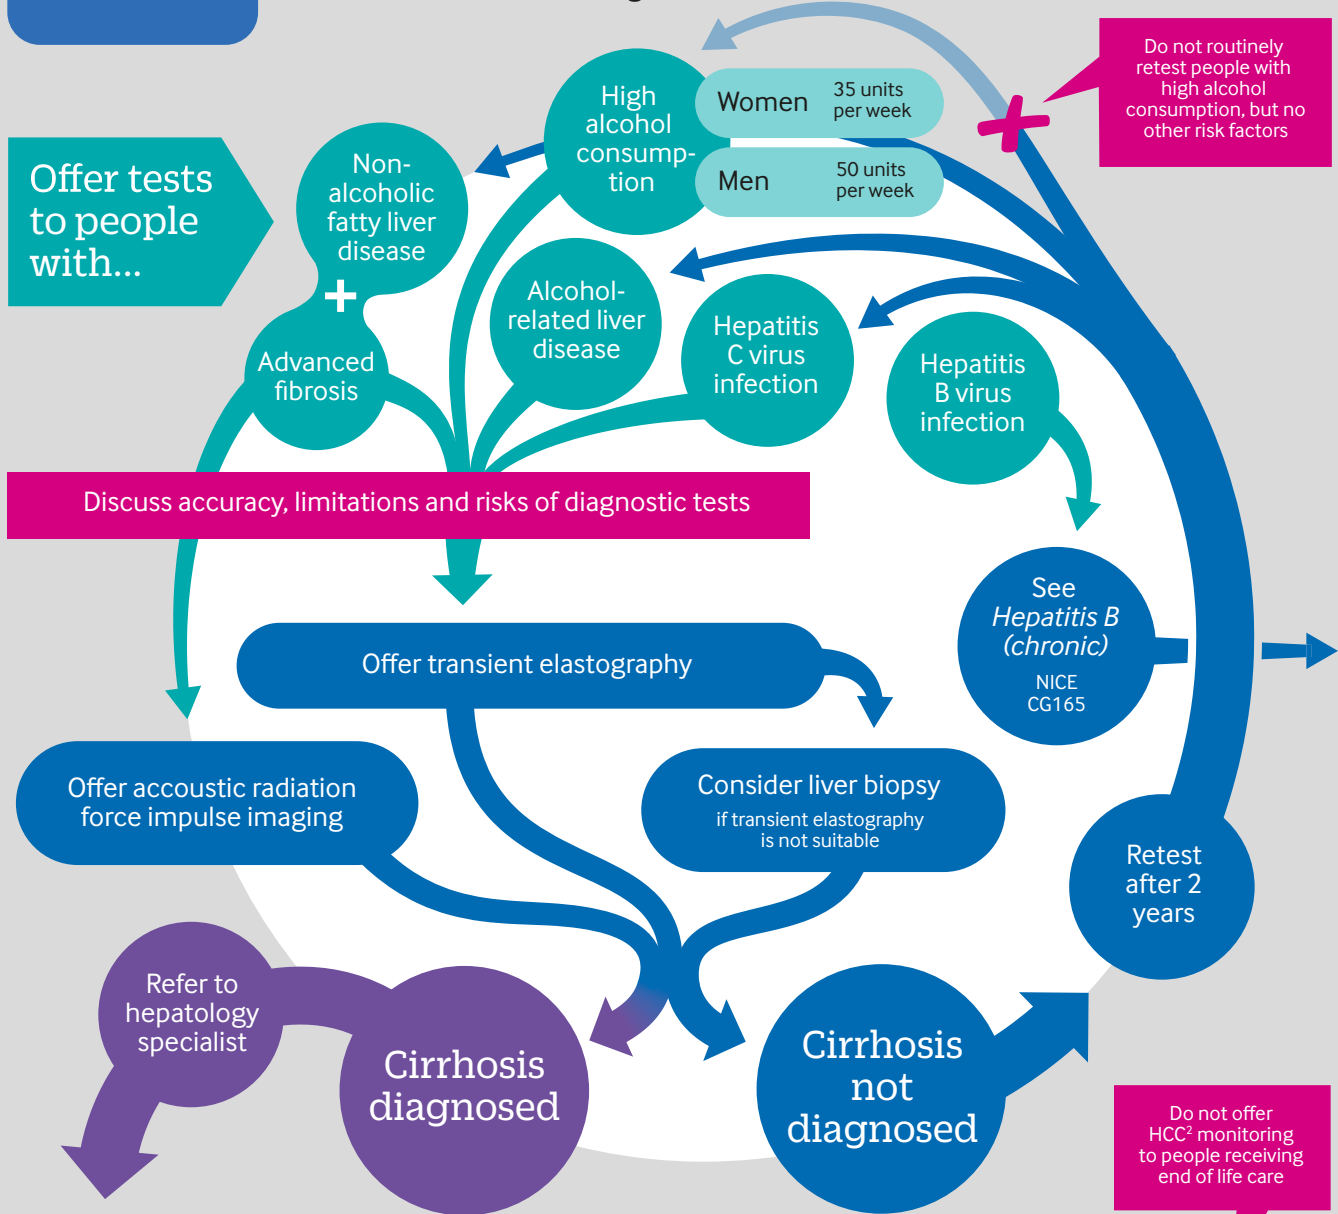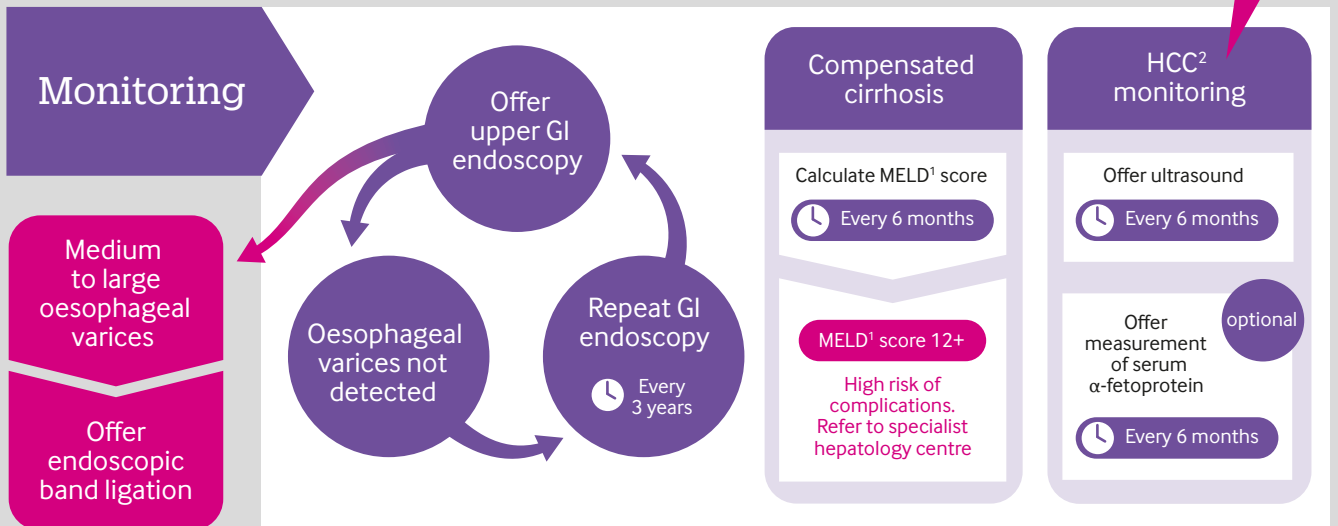

<sup>1</sup> Model for End-Stage Liver Disease

<sup>2</sup> Hepatocellular carcinoma
